# Supplementary material for: Illness-Death Model as a Framework for Chronic Disease Burden Projection: Application to Mental Health Epidemiology
Source: PubMed Central journal article supplement (PMC10910899; doi:10.3389/fepid.2022.903652), 2022-06-27

## *Supplementary Material*

- 1. Supplementary Table 1. List of data sources used for projections of the prevalence of anxiety disorders**
- 2. Supplementary Figure 1. Age-specific incidence, mortality, and remission probability of anxiety disorders among women, 2019**



### Supplementary Figure 1. Age-specific incidence, mortality, and remission probability of anxiety disorders among women, 2019

A snapshot of anxiety disorders transition probabilities used in the illness-death model-based projection: a) age-specific incidence, b) mortality, and c) remission probability among women in Germany in 2019.

a)

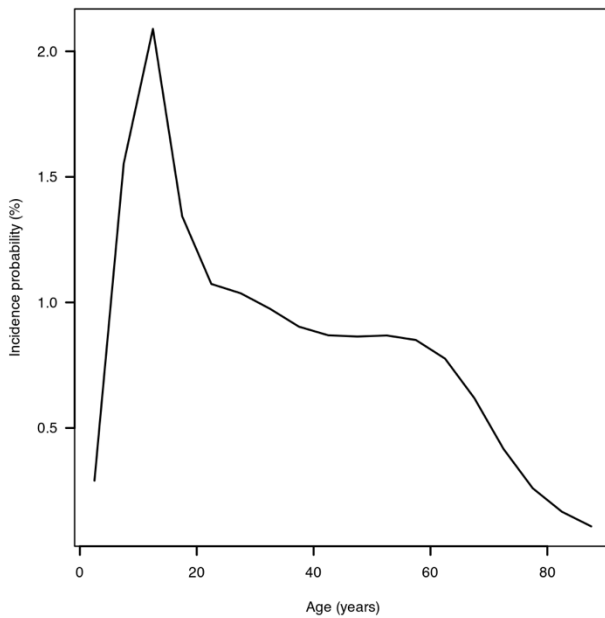

b)

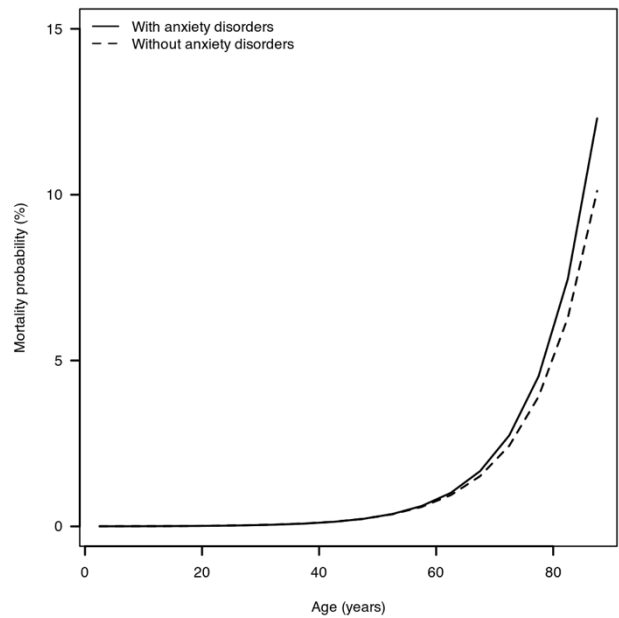

c)

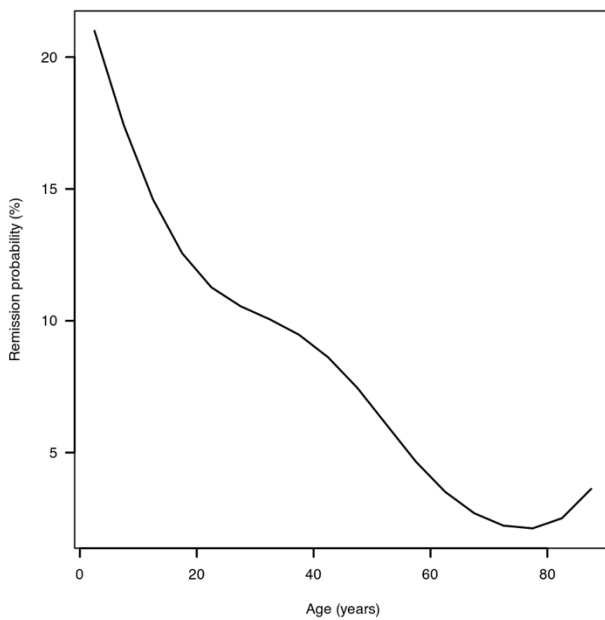

Supplement: Data_Sheet_1.pdf [file Data_Sheet_1.pdf]
